# Supplementary material
Source: Research Square preprint supplement (doi:10.21203/rs.3.rs-10077040/v1)
Supplement: Supplementary file 1 [file 4ee1b128352af8c31a821a63.docx]

Supplementary materials

**Beyond Graphitization: Synergistic Roles of Coexisting Carbon Nanostructures in Low-Friction a-C Tribofilm**

*Jiajun Zhuang#,Zuobang Yuan#, Peidong Xue*, Cheng Chen*

**Contents:**

1. **Tribometer with a motorized injection unit for nanoparticles delivery**
2. **Tribometer with a motorized injection unit for nanoparticles delivery**


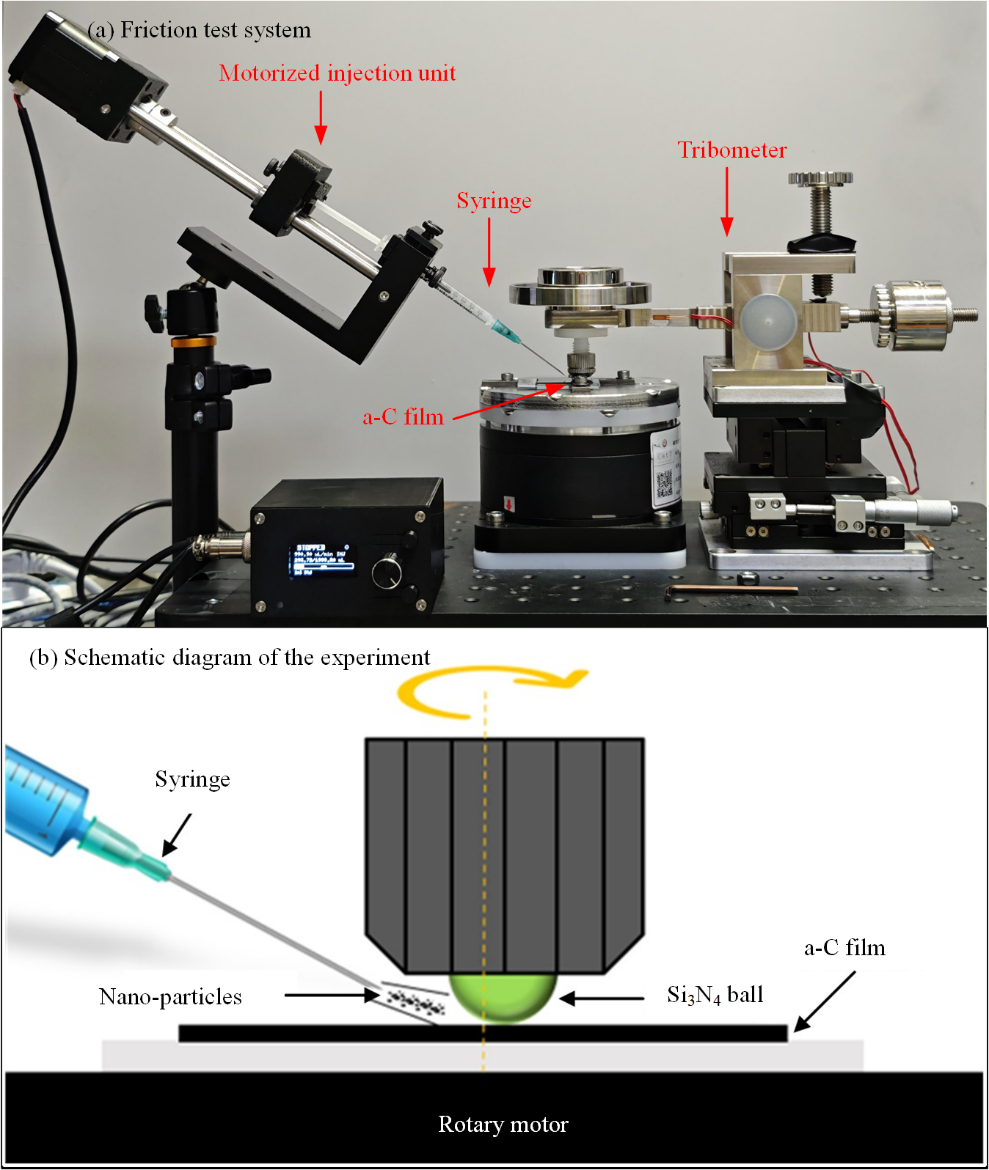


S1 Tribometer with a motorized injection unit for nanoparticles delivery. (a) optical photo. (b) schematic diagram of the experiment

The friction tester consisted with a tribometer, a syringe for delivery of nano-particles and a motorized injection unit, as shown in Fig. S1(a). The syringe is driven by a motorized injection unit, which injects 2 ml of dry nanoparticles into the friction interface each time, as shown in Fig. S1(b).
